# Supplementary material
Source: PubMed Central journal article supplement (PMC5010921)
Supplement: NIHMS805189-supplement-1.pdf [file NIHMS805189-supplement-1.pdf]

# Figure S1

**A**

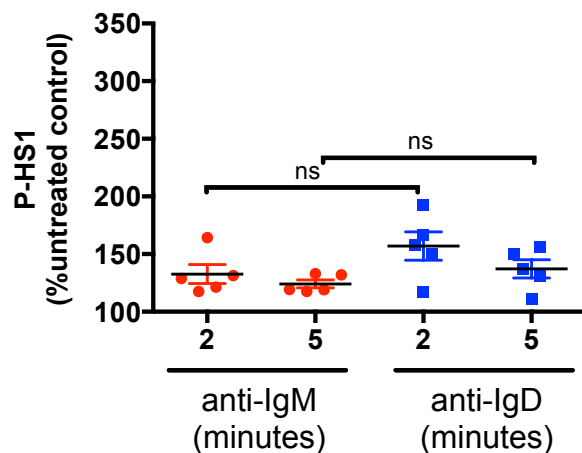

**B**

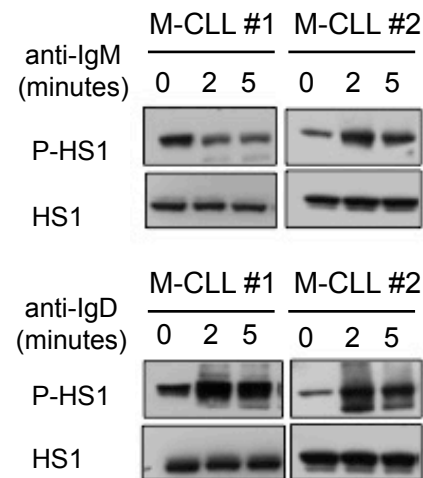

**C**

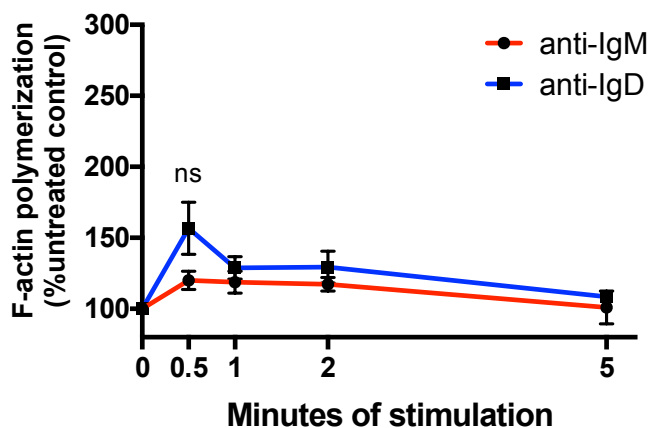

**D**

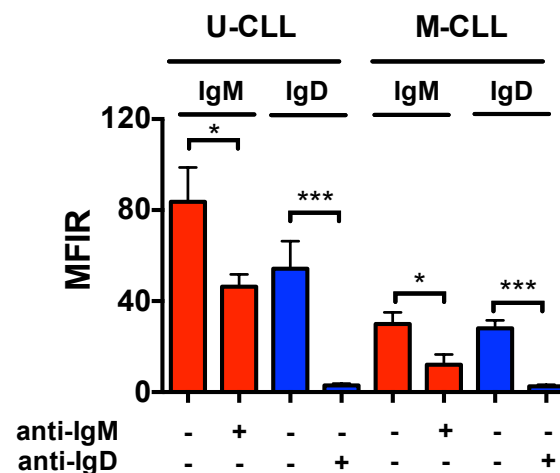

**Figure S1. HS1 activation and F-actin polymerization studies in M-CLL cases, and receptor internalization assays. (A)** Mean  $\pm$  SEM of HS1 protein phosphorylation (P-HS1), after 2 and 5 minutes of anti-IgM or anti-IgD stimulation, as analyzed by flow cytometry on 5 M-CLL cases, and expressed as percentage (%) of the untreated control. ns: not significant; Mann-Whitney test. **(B)** Western Blot analysis of P-HS1 at the activatory tyrosine residue Y397 and HS1 total levels after 2 and 5 minutes of anti-IgM or anti-IgD stimulation. Two representative M-CLL cases (M-CLL#1, M-CLL#2) out of 5 tested are shown. **(C)** Mean  $\pm$  SEM of F-actin polymerization after a period of 5 minutes of anti-IgM or anti-IgD stimulation, as analyzed on 4 M-CLL cases, and expressed as % of the untreated control. ns: not significant; Mann-Whitney test. **(D)** Mean  $\pm$  SEM of IgM and IgD receptor expression, expressed as Mean Fluorescent Intensity Ratio (MFIR) before and after 5 minutes of anti-IgM and anti-IgD stimulation, as analyzed by flow cytometry on 9 U-CLL and 6 M-CLL cases. \* $P < 0.05$ , \*\*\* $P < 0.001$ ; paired t test.

## Figure S2

**A**

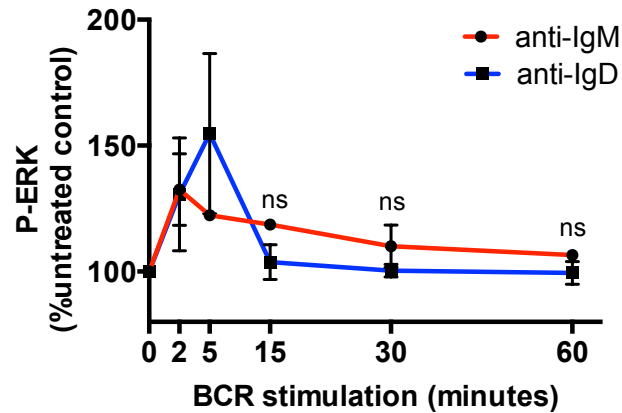

**B**

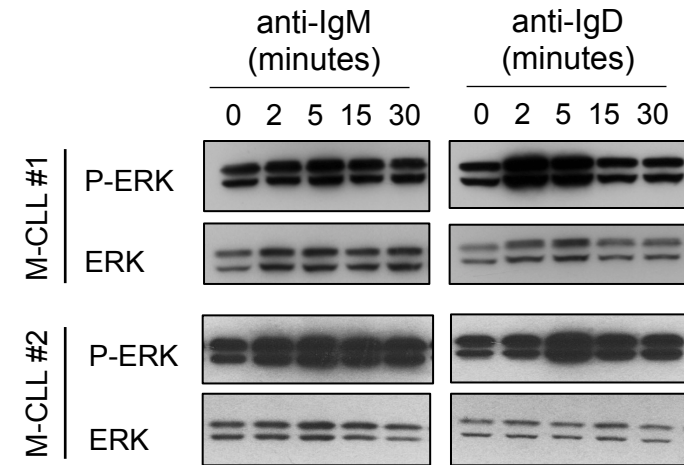

**Figure S2. ERK kinase activation kinetics in M-CLL cases.** (A) Mean  $\pm$  SEM of ERK kinase phosphorylation (P-ERK), at serial time points following IgM or IgD stimulation, as analyzed by flow cytometry on 5 M-CLL samples, and expressed as percentage (%) of the untreated control. ns; not significant; Mann Whitney test. (B) Western Blot analysis of P-ERK and ERK total levels at serial time points following anti-IgM or anti-IgD stimulation. Two representative M-CLL cases (M-CLL#1, M-CLL#2) out of 5 tested are shown.

**Figure S3**

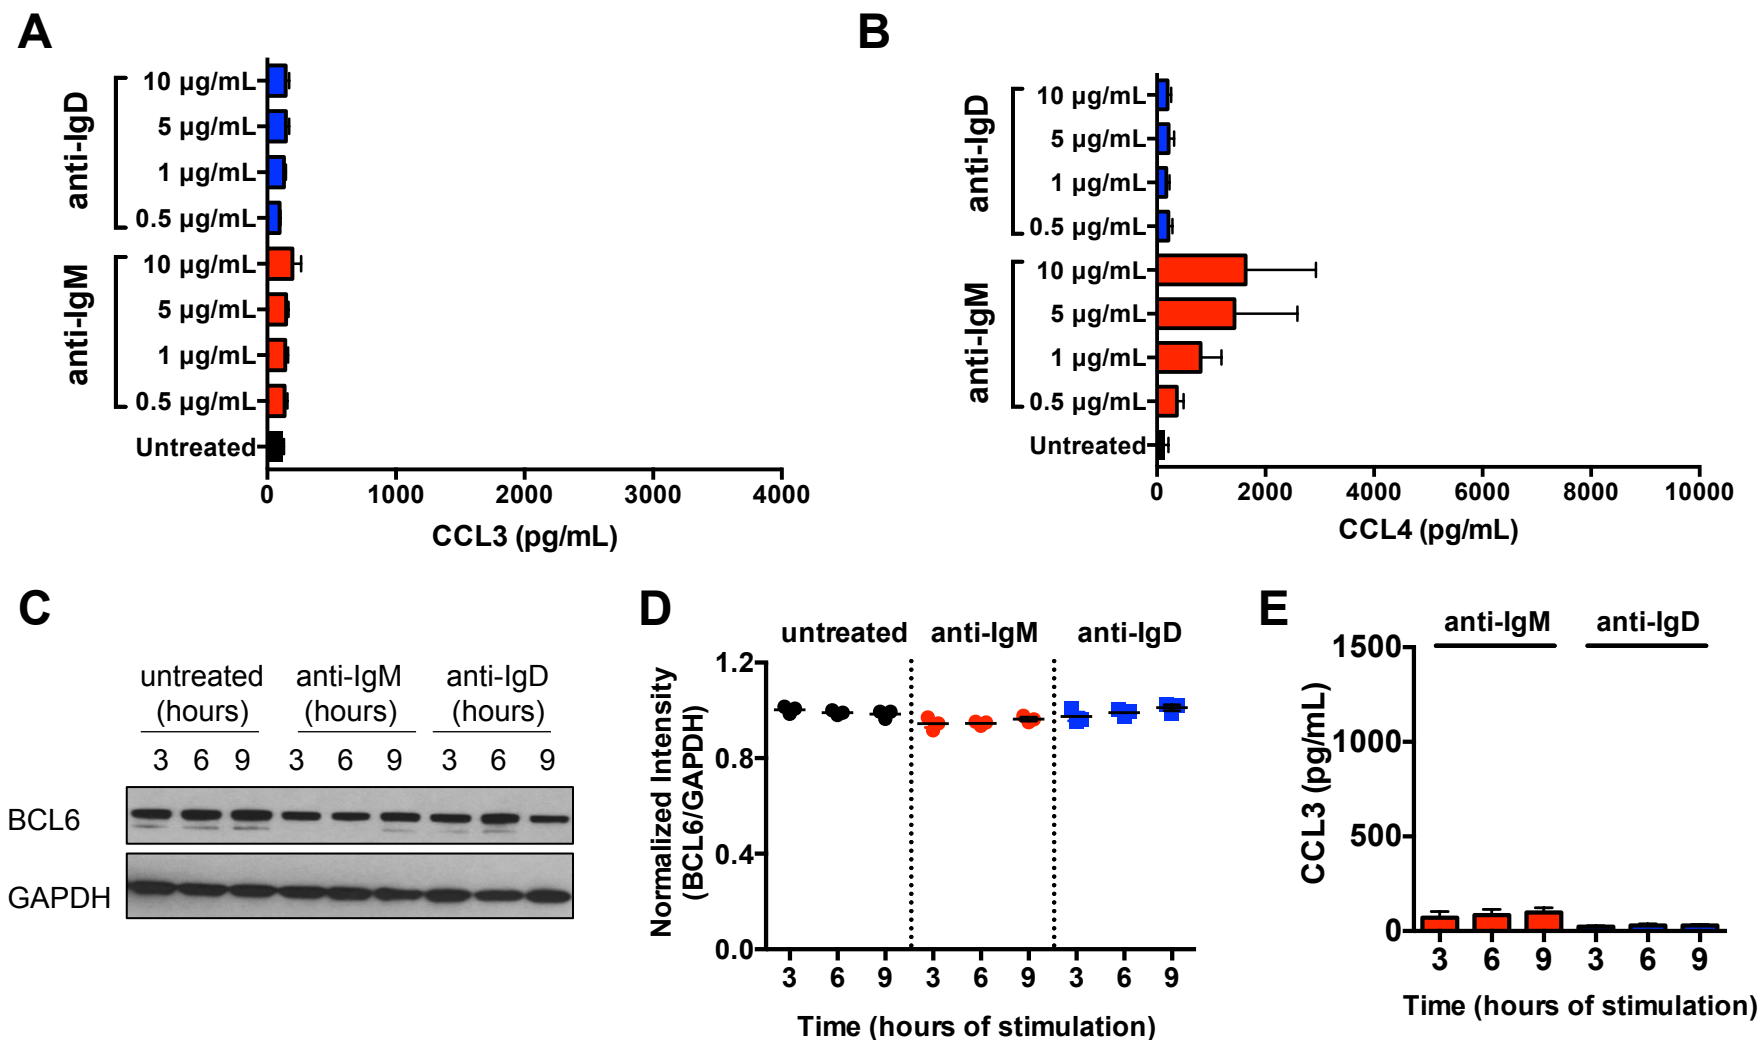

**Figure S3. CCL3 and CCL4 chemokine secretion and BCL6 protein expression in M-CLL cells.** (A) CCL3 and (B) CCL4 measurement by ELISA in the supernatants of 5 M-CLL samples after 24-hour stimulation with increasing concentrations of anti-IgM and anti-IgD. Displayed are the means  $\pm$  SEM of chemokine concentrations in pg/mL. (C) Western Blot analysis of BCL6 protein expression at serial time points following anti-IgM or anti-IgD stimulation in one representative M-CLL case. GAPDH protein levels were analyzed, as loading control. (D) Quantification of BCL6 protein expression in 3 M-CLL cases after anti-IgM or anti-IgD, expressed as normalized intensity between BCL6 and GAPDH levels. (E) CCL3 chemokine measurement in the supernatants of 3 M-CLL cases at serial time points following anti-IgM or anti-IgD stimulation. Displayed are the means  $\pm$  SEM of chemokine concentrations in pg/mL.

| Functional assay                                                                       | U-CLL cases (#)                                                                                                                            | IgM and IgD MFIR (mean±SEM) of U-CLL | M-CLL cases (#)                                                                                                                        | IgM and IgD MFIR (mean±SEM) of M-CLL |
|----------------------------------------------------------------------------------------|--------------------------------------------------------------------------------------------------------------------------------------------|--------------------------------------|----------------------------------------------------------------------------------------------------------------------------------------|--------------------------------------|
| HS1 phosphorylation (*only flow cytometry; †ibrutinib treatment; ‡combination studies) | 5 <sup>†‡</sup> ,14 <sup>†‡</sup> ,17* <sup>†‡</sup> ,24 <sup>†‡</sup> ,25* <sup>†‡</sup> ,54,60                                           | IgM: 91.29±10.66<br>IgD: 64.50±14.59 | 3,7,13,16,22                                                                                                                           | IgM: 37.08±7.17<br>IgD: 36.87±12.5   |
| F-actin polymerization                                                                 | 37,81,82,83                                                                                                                                | IgM: 84.26±13.97<br>IgD: 58.75±16.90 | 8,42,78,79                                                                                                                             | IgM: 34.25±6.60<br>IgD: 38.03±10.78  |
| Receptor internalization (*anti-Igκ stimulation)                                       | 2,17,24,27,40*,59,70*,76*,77*                                                                                                              | IgM: 83.63±15.13<br>IgD: 54.28±12.07 | 4,7,15,19,22,52                                                                                                                        | IgM: 29.18±5.41<br>IgD: 27.72±3.34   |
| ERK phosphorylation (†ibrutinib treatment; ‡combination studies)                       | 5 <sup>†‡</sup> ,14 <sup>†‡</sup> ,17 <sup>†‡</sup> ,24 <sup>†‡</sup> ,60                                                                  | IgM: 80.53±7.78<br>IgD: 63.40±15.25  | 3,7,13,16,22                                                                                                                           | IgM: 37.08±7.17<br>IgD: 36.87±12.5   |
| CCL3 and CCL4 secretion (‡combination studies)                                         | 17,20 <sup>‡</sup> ,24 <sup>‡</sup> ,25,30,32 <sup>‡</sup> ,40 <sup>‡</sup>                                                                | IgM: 123.3±19.43<br>IgD: 74.98±21.40 | 3,13,21,29,47                                                                                                                          | IgM: 40.12±11.34<br>IgD: 40.88±19.58 |
| BCL6 protein expression                                                                | 27,67,68                                                                                                                                   | IgM: 76.01±20.40<br>IgD: 55.66±21.40 | 18,42,50                                                                                                                               | IgM: 48.19±18.90<br>IgD: 48.89±15.45 |
| Viability (†ibrutinib treatment; ‡combination studies)                                 | 2 <sup>†‡</sup> ,5 <sup>†‡</sup> ,6,10 <sup>†</sup> ,14 <sup>†‡</sup> ,17 <sup>†</sup> ,24 <sup>†‡</sup> ,25 <sup>†‡</sup> ,26,54,59,70,73 | IgM: 84.56±12.27<br>IgD: 47.11±10.46 | 7,8,11,12 <sup>†</sup> ,13 <sup>†</sup> ,15 <sup>†</sup> ,16 <sup>†</sup> ,18 <sup>†</sup> ,21,22 <sup>†</sup> ,23 <sup>†</sup> ,64,65 | IgM: 42.10±7.59<br>IgD: 34.37±8.54   |
| CLL-NLC co-cultures                                                                    | 27,28,54,59,67,69,70,72,74,77                                                                                                              | IgM: 73.61±9.96<br>IgD: 55.70±10.32  | 8,18,42,52,62,63,64,65                                                                                                                 | IgM: 43.58±10.15<br>IgD: 43.61±10.34 |

**Table SI. U-CLL and M-CLL cases analyzed in functional assays.** Functional assays and number (#) of U-CLL and M-CLL analyzed cases. Arabic numerals refer to the sample list as in Table I. Means ±SEM of IgM and IgD mean fluorescent intensity ratios (MFIR) of the analyzed subgroups are also indicated.
